# Supplementary material for: Indication of paleoecological evidence on the evolution of alpine vegetation productivity and soil erosion in central China since the mid-Holocene
Source: Springer Nature journal article supplement (doi:10.1007/s11430-020-9757-1), 2021-08-02
Supplement: MOESM1 [file 11430_2020_9757_MOESM1_ESM.pdf]

## Appendix

**Table S1** Radiocarbon dates for PML13 sediment sequences, Mt. Taibai, central China

| Lab no     | Material dated | Depth (cm) | <sup>14</sup> C age (yr BP) | Calibrated age (cal. yr BP) | Range (cal. yr BP) (2σ) |
|------------|----------------|------------|-----------------------------|-----------------------------|-------------------------|
| Beta485246 | Bulk Sediment  | 21.5       | 1100±30                     | 1001                        | 937–1064                |
| BA131710   | Bulk Sediment  | 29.5       | 1485±20                     | 1366                        | 1325–1406               |
| BA150625   | Bulk Sediment  | 57.5       | 2345±20                     | 2354                        | 2329–2378               |
| BA131711   | Bulk Sediment  | 79.5       | 2760±25                     | 2838                        | 2782–2894               |
| BA150626   | Bulk Sediment  | 100.5      | 3255±25                     | 3502                        | 3443–3561               |
| Beta485248 | Bulk Sediment  | 118.5      | 3840±30                     | 4255                        | 4151–4358               |
| Beta485249 | Bulk Sediment  | 137.5      | 5040±30                     | 5807                        | 5713–5900               |
| BA131712   | Bulk Sediment  | 144.5      | 5025±25                     | 5849                        | 5805–5892               |

**Table S2** Correlation analysis between climatic factors and the environmental proxies<sup>a)</sup>

| Magnetic parameters                                               | Indicative significance                                                                                                                 | <i>r</i> |                      |                         |
|-------------------------------------------------------------------|-----------------------------------------------------------------------------------------------------------------------------------------|----------|----------------------|-------------------------|
|                                                                   |                                                                                                                                         | EASM     | Summer precipitation | Mean annual temperature |
| $\chi_{lr}$ ( $10^{-8} \text{ m}^3 \text{ kg}^{-1}$ )             | A rough measure of ferrimagnetic minerals                                                                                               | −0.72    | −0.51                | 0.67                    |
| ARM ( $10^{-6} \text{ Am}^2 \text{ kg}^{-1}$ )                    | Indicates the content of SSD grains                                                                                                     | −0.76    | −0.59                | 0.78                    |
| IRM <sub>300 mT</sub> ( $10^{-6} \text{ Am}^2 \text{ kg}^{-1}$ )  | Hard Isothermal Remnant Magnetization, the content of ferrimagnetic minerals                                                            | −0.80    | −0.67                | 0.79                    |
| SIRM ( $10^{-6} \text{ Am}^2 \text{ kg}^{-1}$ )                   | Saturation Isothermal Remnant Magnetization, the content of all magnetic minerals (ferritic minerals, antiferromagnetic minerals, etc.) | −0.76    | −0.62                | 0.77                    |
| IRM <sub>−100 mT</sub> ( $10^{-6} \text{ Am}^2 \text{ kg}^{-1}$ ) | Indicates the content of antiferromagnetic minerals                                                                                     | 0.82     | 0.69                 | −0.83                   |
| IRM <sub>−300 mT</sub> ( $10^{-6} \text{ Am}^2 \text{ kg}^{-1}$ ) | Indicates the content of antiferromagnetic minerals                                                                                     | 0.81     | 0.68                 | −0.81                   |
| IRM <sub>300 mT</sub> /SIRM                                       | The relative content of ferrimagnetic minerals in the total ferromagnetic minerals                                                      | −0.70    | −0.60                | 0.66                    |
| IRM <sub>−100 mT</sub> /SIRM                                      | The proportion of antiferromagnetic minerals in total ferromagnetic minerals                                                            | 0.73     | 0.59                 | −0.75                   |
| IRM <sub>−300 mT</sub> /SIRM                                      | The proportion of antiferromagnetic minerals in total ferromagnetic minerals                                                            | 0.76     | 0.62                 | −0.77                   |
| ARM/SIRM                                                          | The proportion of SSD grains in total ferromagnetic minerals                                                                            | −0.32    | −0.22                | 0.38                    |

a) Correlations listed in this table are all significant ( $p < 0.01$ ) according to *t*-test.

**Table S3** Correlation matrix of the grain size and mineral magnetic parameters<sup>a)</sup>

| <i>r</i>                     | Mean grain size | $\chi_{lr}$ | ARM   | IRM <sub>300 mT</sub> | SIRM  | IRM <sub>−100 mT</sub> | IRM <sub>−300 mT</sub> | IRM <sub>300 mT</sub> /SIRM | IRM <sub>−100 mT</sub> /SIRM | IRM <sub>−300 mT</sub> /SIRM | ARM/SIRM |
|------------------------------|-----------------|-------------|-------|-----------------------|-------|------------------------|------------------------|-----------------------------|------------------------------|------------------------------|----------|
| Mean grain size              | 1.00            |             |       |                       |       |                        |                        |                             |                              |                              |          |
| $\chi_{lr}$                  | −0.33           | 1.00        |       |                       |       |                        |                        |                             |                              |                              |          |
| ARM                          | −0.44           | 0.88        | 1.00  |                       |       |                        |                        |                             |                              |                              |          |
| IRM <sub>300 mT</sub>        | −0.35           | 0.93        | 0.94  | 1.00                  |       |                        |                        |                             |                              |                              |          |
| SIRM                         | −0.36           | 0.94        | 0.94  | 0.98                  | 1.00  |                        |                        |                             |                              |                              |          |
| IRM <sub>−100 mT</sub>       | 0.35            | −0.90       | −0.94 | −0.97                 | −0.95 | 1.00                   |                        |                             |                              |                              |          |
| IRM <sub>−300 mT</sub>       | 0.33            | −0.92       | −0.92 | −0.99                 | −0.97 | 0.98                   | 1.00                   |                             |                              |                              |          |
| IRM <sub>300 mT</sub> /SIRM  | −0.34           | 0.75        | 0.80  | 0.85                  | 0.73  | −0.82                  | −0.82                  | 1.00                        |                              |                              |          |
| IRM <sub>−100 mT</sub> /SIRM | 0.44            | −0.89       | −0.96 | −0.91                 | −0.91 | 0.96                   | 0.92                   | −0.81                       | 1.00                         |                              |          |
| IRM <sub>−300 mT</sub> /SIRM | 0.38            | −0.89       | −0.92 | −0.93                 | −0.90 | 0.96                   | 0.95                   | −0.88                       | 0.96                         | 1.00                         |          |
| ARM/SIRM                     | −0.46           | 0.41        | 0.68  | 0.42                  | 0.39  | −0.49                  | −0.40                  | 0.55                        | −0.67                        | −0.57                        | 1.00     |

a) Correlations listed in this table are all significant ( $p < 0.01$ ) according to *t*-test.

**Table S4** Total variance interpretation of principal component analysis

| PC | Initial eigenvalue |                            |                  | Extraction sums of squared loadings |                            |                  |
|----|--------------------|----------------------------|------------------|-------------------------------------|----------------------------|------------------|
|    | Total              | Percentage of variance (%) | Accumulation (%) | Total                               | Percentage of variance (%) | Accumulation (%) |
| 1  | 8.758              | 79.620                     | 79.620           | 8.758                               | 79.620                     | 79.620           |
| 2  | 1.092              | 9.923                      | 89.543           | 1.092                               | 9.923                      | 89.543           |
| 3  | 0.598              | 5.434                      | 94.977           |                                     |                            |                  |
| 4  | 0.306              | 2.777                      | 97.754           |                                     |                            |                  |
| 5  | 0.113              | 1.024                      | 98.779           |                                     |                            |                  |
| 6  | 0.094              | 0.852                      | 99.631           |                                     |                            |                  |
| 7  | 0.022              | 0.197                      | 99.828           |                                     |                            |                  |
| 8  | 0.014              | 0.132                      | 99.959           |                                     |                            |                  |
| 9  | 0.004              | 0.035                      | 99.994           |                                     |                            |                  |
| 10 | 0.000              | 0.004                      | 99.999           |                                     |                            |                  |
| 11 | 0.000              | 0.001                      | 100.000          |                                     |                            |                  |

**Table S5** Component matrix of principal component analysis.

|                              | Component |        |
|------------------------------|-----------|--------|
|                              | 1         | 2      |
| Mean grain size              | -0.446    | 0.702  |
| $\chi_{if}$                  | 0.929     | 0.178  |
| ARM                          | 0.974     | -0.078 |
| IRM <sub>300 mT</sub>        | 0.972     | 0.181  |
| SIRM                         | 0.953     | 0.193  |
| IRM <sub>-100 mT</sub>       | -0.977    | -0.121 |
| IRM <sub>-300 mT</sub>       | -0.969    | -0.209 |
| IRM <sub>300 mT</sub> /SIRM  | 0.864     | -0.025 |
| IRM <sub>-100 mT</sub> /SIRM | -0.975    | 0.080  |
| IRM <sub>-300 mT</sub> /SIRM | -0.975    | -0.031 |
| ARM/SIRM                     | 0.592     | -0.652 |

**Table S6** RDA ordination summary

| Axes                                           | Axis 1 | Axis 2 | Axis 3 | Total variance |
|------------------------------------------------|--------|--------|--------|----------------|
| Eigenvalues                                    | 8.495  | 0.171  | 0.052  | 1.000          |
| Cumulative percentage variance of species data | 53.1   | 54.2   | 54.5   |                |
| of species-environment relation                | 97.4   | 99.4   | 100    |                |
| Sum of all eigenvalues                         |        |        |        | 1.000          |
| Sum of all canonical eigenvalues               |        |        |        | 8.718          |

**Table S7** Correlations between climatic factors with the axis<sup>a)</sup>

| Parameters              | Axis 1 | Axis 2 |
|-------------------------|--------|--------|
| EASM index              | 0.92   | 0.31   |
| Summer precipitation    | 0.79   | -0.48  |
| Mean annual temperature | -0.92  | -0.07  |

a) Significant correlations are marked with dark backgrounds ( $p < 0.01$ ) according to  $t$ -test.
